# Supplementary material for: Development and validation of a dynamic prognostic score for hepatitis B virus-related acute-on-chronic liver failure
Source: Research Square preprint supplement (doi:10.21203/rs.3.rs-6733150/v1), 2025-06-29
Supplement: Supplementary file 1 [file 67e2331fda1c03e7ff8aefe8.docx]

Supplementary Table 2. The multivariate cox regression of clinical indicators.

|  | β | SE | Wald | P | Exp（B） |
| --- | --- | --- | --- | --- | --- |
| TB | 0.005 | 0.002 | 8.839 | 0.003 | 1.005 (1.002-1.008) |
| PT-INR | 0.609 | 0.198 | 9.454 | 0.002 | 1.838 (1.247-2.710) |
| δCOSSH-ACLF II7-0 | 1.234 | 0.179 | 47.502 | 0.000 | 3.434 (2.418-4.877) |

Note: TB, total bilirubin; INR: prothrombin time-international normalized ratio; COSSH-ACLF П, Chinese Group on the Study of Severe Hepatitis B-ACLF score II.
