# Supplementary material for: Development and validation of a dynamic prognostic score for hepatitis B virus-related acute-on-chronic liver failure
Source: Research Square preprint supplement (doi:10.21203/rs.3.rs-6733150/v1), 2025-06-29
Supplement: Supplementary file 2 [file 81ab32bc799ca282f1bf25b9.docx]

The detailed protocol of treatment for ACLF

All patients received integrated treatment during hospitalization. Nutritional support therapy was used to all enrolled patients, including intravenous high glucose, vitamin, glutathione, adenosylmethionine, or branched-chain amino acids and use of albumin or plasma for hypoproteinemia. Among patients with HBV pathogen, nucleoside analogs were instantly given if HBV-DNA is positive (entecavir 0.5 mg, or tenofovir 300mg or tenofovir alafenamide fumarate 25mg oral per day). Patients with moderate ascites were treated with sodium and water restriction and/or diuretics (anti-mineralocorticoids and/or loop Diuretics). Diagnostic abdominocentesis was performed in patients with ascites to examine whether with spontaneous bacterial peritonitis. Paracentesis combined with intravenous albumin was used in those with large or refractory ascites. Patients with acute gastrointestinal hemorrhage received intravenous somatostatin, pituitrin, vitamin K and proton pump inhibitors. Urgent therapeutic endoscopy and/or transjugular intrahepatic portosystemic shunting were instantly performed for uncontrolled hemorrhage. Fluid replacement was performed in patients with mean arterial pressure <70 mmHg, and vasoactive agents were used when necessary. Patients with hepatic encephalopathy were given lactulose, antibiotics, neomycin, sodium benzoate and L-ornithine aspartate; Although restriction of dietary protein remains is cornerstone of therapy, protein intake of l-2 g/kg per day still be required for maintaining an adequate nitrogen balance. Tracheal intubation was performed for patients with hepatic encephalopathy grade iii or iv. Patients with bacterial infection were treated with empirical antibiotic therapy firstly, then the strategy was adjusted immediately based on bacteria culture and antibiotic sensitivity test. Fungal superinfection would be avoided. Patients with renal failure were treated with intravenous albumin, or renal replacement therapy. vasoconstrictors (such as dopamine, noradrenaline, or terlipressine) could be used in patients with refractory hypotension. Patients with PaO2 < 80 mmHg were given persistent low flow oxygen therapy (2-4 L/min). Mechanical ventilation was chosen according to severity of respiratory dysfunction.
