# Supplementary material for: Development and validation of a dynamic prognostic score for hepatitis B virus-related acute-on-chronic liver failure
Source: Research Square preprint supplement (doi:10.21203/rs.3.rs-6733150/v1), 2025-06-29
Supplement: Supplementary file 3 [file ce9b45c194979ad84ddb5bc3.docx]

Supplementary Table 1. The univariate cox regression of clinical indicators.

|  | β | SE | Wald | P | Exp（B） |
| --- | --- | --- | --- | --- | --- |
| TB | 0.005 | 0.002 | 7.939 | 0.005 | 1.005 (1.001-1.008) |
| ALT | -0.001 | 0.001 | 4.789 | 0.029 | 0.999 (0.998-1.000) |
| Na+ | -0.082 | 0.029 | 8.075 | 0.004 | 0.921 (0.870-0.975) |
| Serum creatinine | 0.010 | 0.004 | 7.290 | 0.007 | 1.010 (1.003-1.017) |
| Serum urea | 0.112 | 0.030 | 13.787 | 0.000 | 1.119 (1.054-1.187) |
| PT-INR | 0.868 | 0.196 | 19.638 | 0.000 | 2.382 (1.623-3.497) |
| FIB | -0.722 | 0.313 | 5.317 | 0.021 | 0.486 (0.263-0.897) |
| δCOSSH-ACLF II7-0 | 1.212 | 0.165 | 53.898 | 0.000 | 3.360 (2.431-4.643) |

Note: TB, total bilirubin; ALT, alanine aminotransferase; Na+, serum sodium; INR, prothrombin time-international normalized ratio; FIB, fibrinogen; COSSH-ACLF П, Chinese Group on the Study of Severe Hepatitis B-ACLF score.
